# Supplementary material for: Efficacy and Safety of Lenvatinib for Neoadjuvant Therapy in Patients with Locally Advanced Thyroid Cancer: A Real-world Prospective Study
Source: Research Square preprint supplement (doi:10.21203/rs.3.rs-7699197/v1), 2025-10-21
Supplement: Supplementary file 1 [file 046e143503e4dad5a001e68f.docx]

**Supplementary Table 1.** Representativeness of Study Participants

| Cancer type(s)/ subtype(s)/stage(s)/condition | Locally advanced thyroid cancer (LATC) |
| --- | --- |
| Considerations related to: | |
| Sex | Female, male. |
| Age | In this study, ten patients were over 50 year-old, which is same with the fact that older patients have more advanced stage. |
| Race/ethnicity | Due to the fact that this study was conducted in Fujian Province, China, the population included in the study was Han Chinese, accounting for 91.1% of the total population in China. |
| Geography | In 2016, there were 202600 new cases of thyroid cancer in China, ranking seventh among all cancers. Among them, there are 152600 women, approximately 75.3% of all patients. |
| Other considerations | None |
| Overall representativeness of this study | In our study, there were 7 female patients and 5 male patients, a high proportion of elderly patients, which is roughly the same as the current proportion of male to female patients. |
